# Supplementary material for: The Role of Modeling and Simulation in Development and Registration of Medicinal Products: Output From the EFPIA/EMA Modeling and Simulation Workshop
Source: PubMed Central journal article supplement — CPT Pharmacometrics Syst Pharmacol. 2013 Feb 27;2(2):e31–. doi: 10.1038/psp.2013.7 (PMC3600760; doi:10.1038/psp.2013.7), 2013-02-27
Supplement: psp20137x1.pdf [file psp20137x1.pdf]

Supplementary Table: Opportunities, Challenges and Actions arising from plenary discussion

| Opportunities with M&S                                                                               | Challenges with M&S                                                                                                           | Actions / Next Steps                                                                                                             |
|------------------------------------------------------------------------------------------------------|-------------------------------------------------------------------------------------------------------------------------------|----------------------------------------------------------------------------------------------------------------------------------|
| Increase efficiency of drug development by integrative data analysis and design optimisation         | Communication gap between modelling scientists and other disciplines both within Industry and between Industry and Regulators | Establish a more standardised and quantitative framework for extrapolation                                                       |
| Integration of new technologies (e.g. Omics) in the development and evaluation of medicinal products | Mis-perception that dose-response characterization and dose regimen selection are determined solely at the company's risk     | Strengthen model and data sharing initiatives<br><br>Debate an update to the current regulatory guidance on dose ranging/finding |
| Support extrapolation of clinical data across different populations                                  | Lack of standardisation of methods for data generation, analysis and reporting                                                | Agree on common good practices, standardisation of methods and reporting                                                         |
| Increase the robustness of both Regulatory and Industry decision-making                              | Heterogeneity and inconsistency in practice of M&S approaches within Industry                                                 | Development of standards on when and how longitudinal analysis can be used for inference in a similar way to landmark analysis   |
| Better use of resources by prioritising more promising drug                                          | Use of model based approaches to make inferential statements around efficacy and safety                                       | Establish communication strategy utilizing existing regulatory pathways                                                          |
| Better informed benefit risk decisions and labelling of medicinal products                           | Difficulties in sharing data in a competitive environment                                                                     | Organise further workshops to continue to share experiences                                                                      |
|                                                                                                      | Variable readiness and capacity of the regulatory system to evaluate M&S approaches                                           | To integrate and expand the influence of M&S competence in the EU regulatory network                                             |
|                                                                                                      | eCTD structure does not lend itself to detailed reporting of MBDD activities                                                  |                                                                                                                                  |
